# Supplementary material for: Onchocerciasis Prevalence among Persons with Epilepsy in an Onchocerciasis Hypo-Endemic Area in the Democratic Republic of Congo: A Cross-Sectional Study
Source: MDPI journal article supplement (doi:10.3390/pathogens10040389), 2021-03-24
Supplement: s1 [file s1]

**Supplementary table. In a subset of 290 patients with negative antigen test results for *Taenia solium*: number and proportion of patients with positive serology for *Onchocerca*, stratified by demographic characteristics, clinical symptoms and signs, and final diagnosis,.**

| Patient characteristic                                     | Number with positive serology | Number tested | Proportion with positive serology | P-value* |      |
|------------------------------------------------------------|-------------------------------|---------------|-----------------------------------|----------|------|
| <b>Sex</b>                                                 |                               |               |                                   |          |      |
| Men                                                        | 29                            | 130           | 22.3%                             | 1.00     |      |
| Women                                                      | 36                            | 160           | 22.5%                             |          |      |
| <b>Age category</b>                                        |                               |               |                                   |          |      |
| <10 years                                                  | 2                             | 14            | 14.3%                             | 0.74     |      |
| ≥ 10 years                                                 | 63                            | 276           | 22.8%                             |          |      |
| <b>Neurological symptoms/signs at presentation</b>         |                               |               |                                   |          |      |
| Epileptic seizure                                          | 23                            | 73            | 31.5%                             | 0.046    |      |
| Gait/walking disorders                                     | 21                            | 84            | 25.0%                             |          |      |
| Focal sensory-motor deficit                                | 16                            | 63            | 25.4%                             |          |      |
| Behaviour disturbance                                      | 13                            | 53            | 24.5%                             |          |      |
| Altered state of consciousness                             | 10                            | 44            | 22.7%                             |          |      |
| Change in sleep pattern                                    | 9                             | 41            | 22.0%                             |          |      |
| Cranial nerve lesion                                       | 4                             | 18            | 22.2%                             |          |      |
| Severe headache                                            | 28                            | 133           | 21.1%                             |          |      |
| Cognitive decline                                          | 1                             | 12            | 8.3%                              |          |      |
| Signs of meningism                                         | 12                            | 91            | 13.2%                             |          |      |
| <b>Skin or soft tissue symptoms</b>                        |                               |               |                                   |          |      |
| Itching                                                    | 0                             | 2             | 0.0%                              |          | 0.07 |
| Localised adenopathy                                       | 4                             | 16            | 25.0%                             |          |      |
| Final diagnosis of late onset epilepsy of unknown etiology | 16                            | 48            | 33.3%                             |          |      |
| <b>Total</b>                                               | <b>65</b>                     | <b>290</b>    | <b>22.4%</b>                      |          |      |
